# Supplementary material for: Tracking the Dairy Microbiota from Farm Bulk Tank to Skimmed Milk Powder
Source: PubMed Central journal article supplement (PMC7141888; doi:10.1128/msystems.00226-20), 2020-04-07

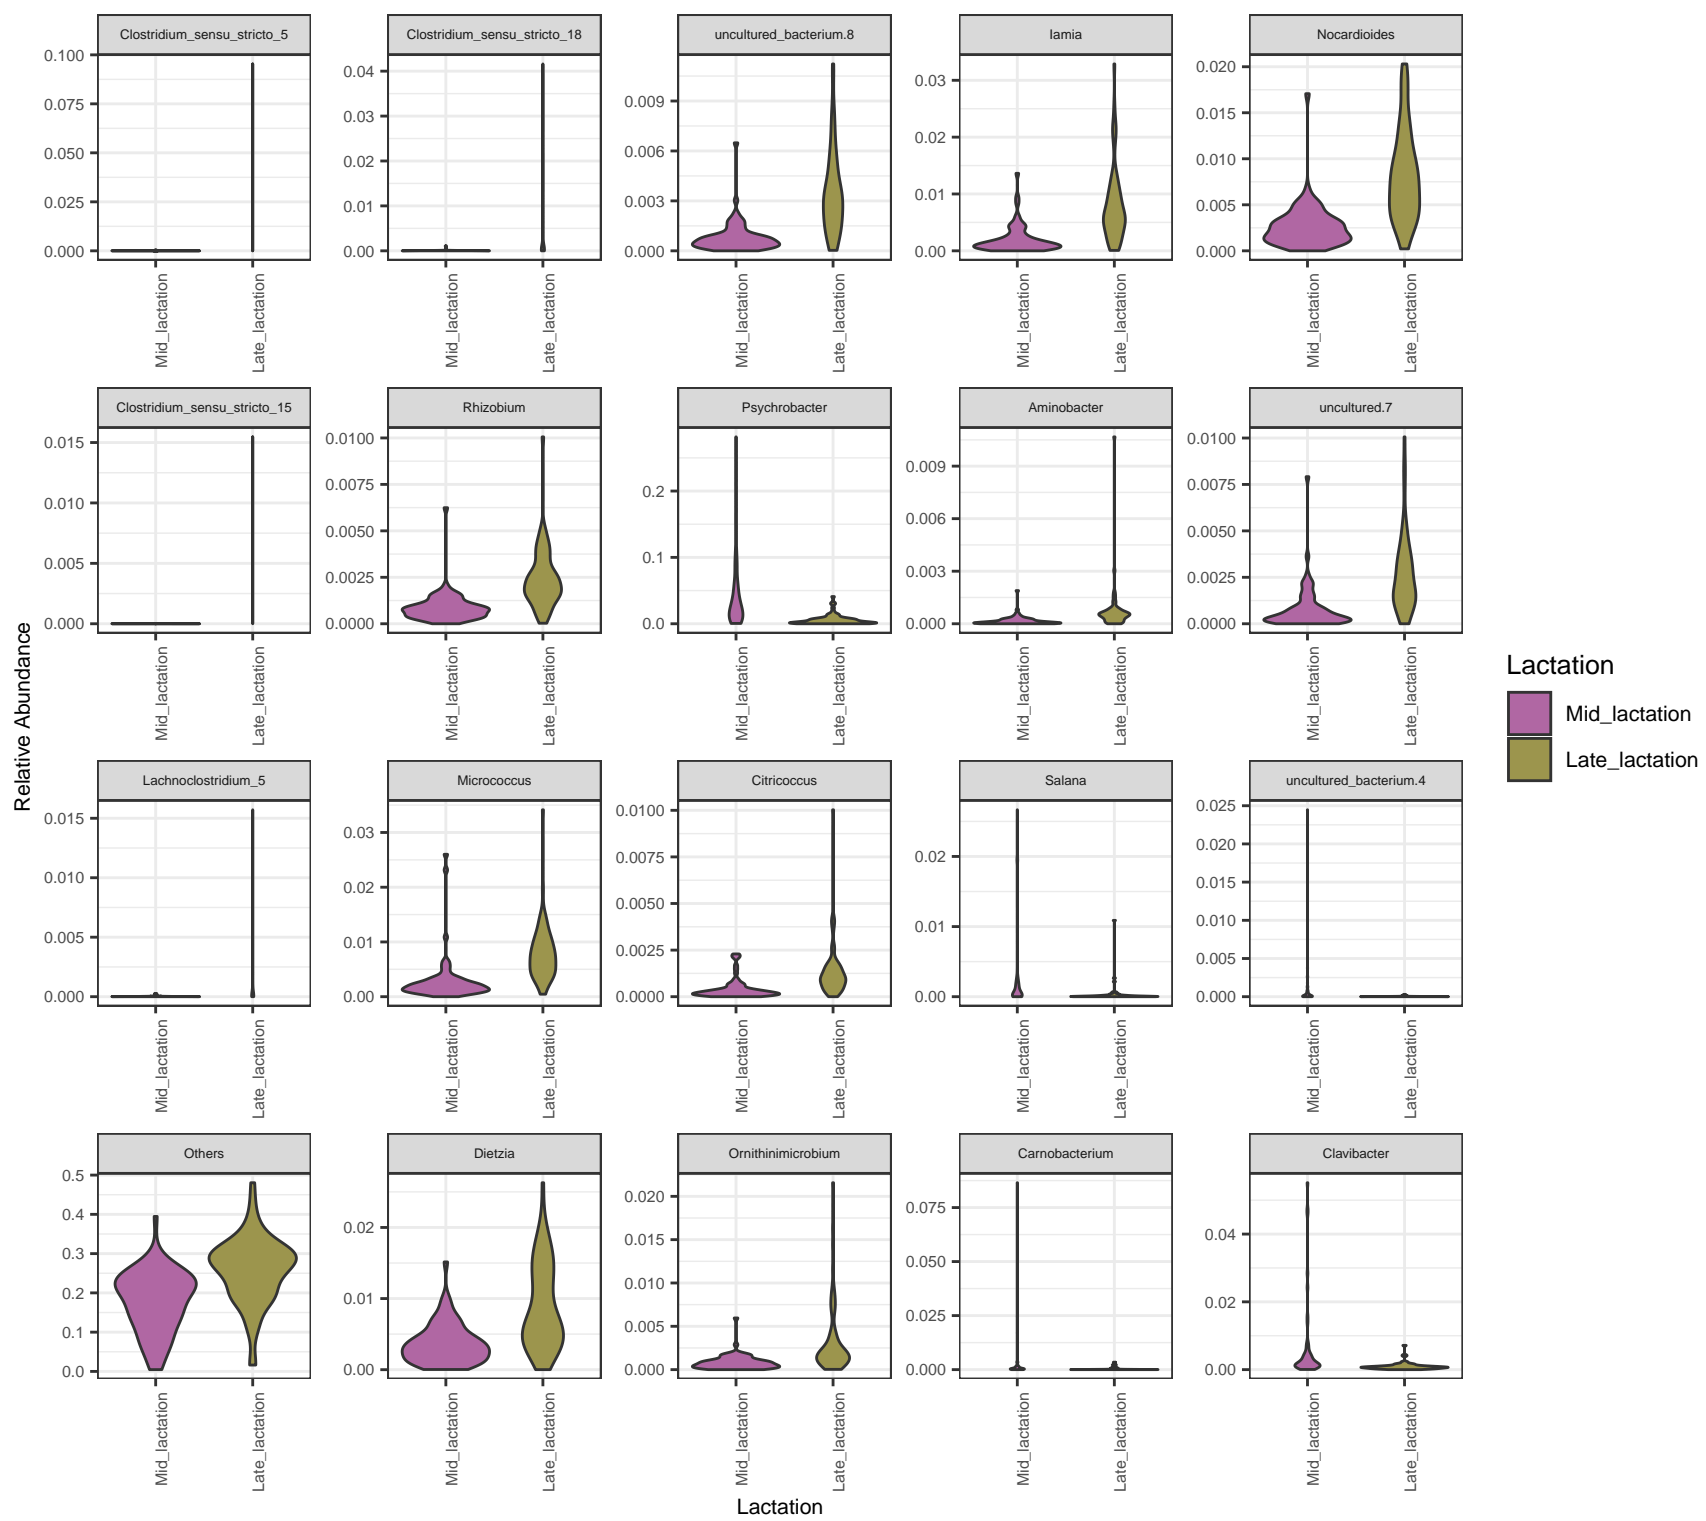

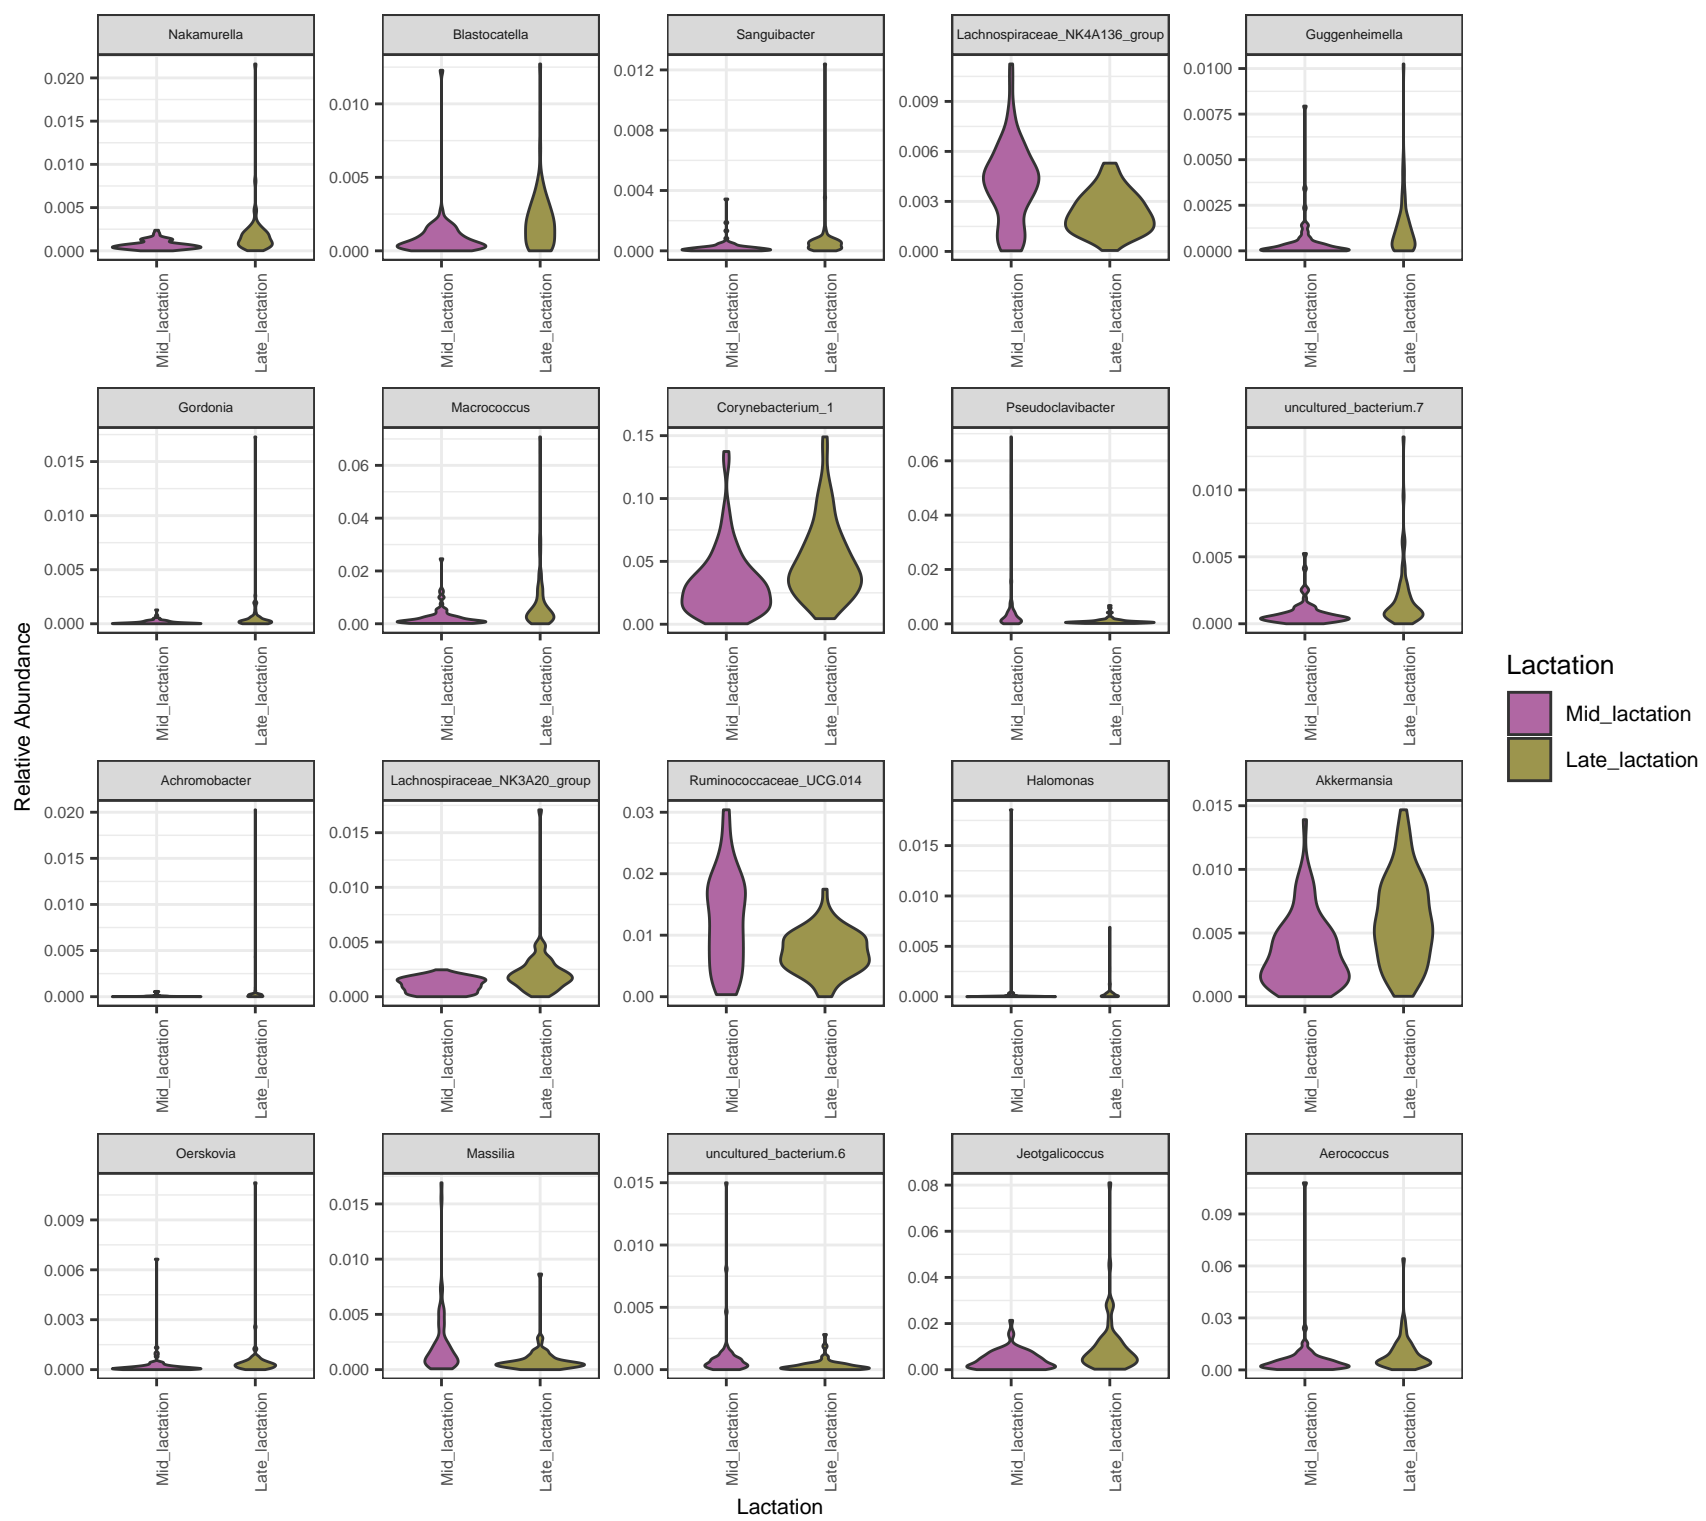

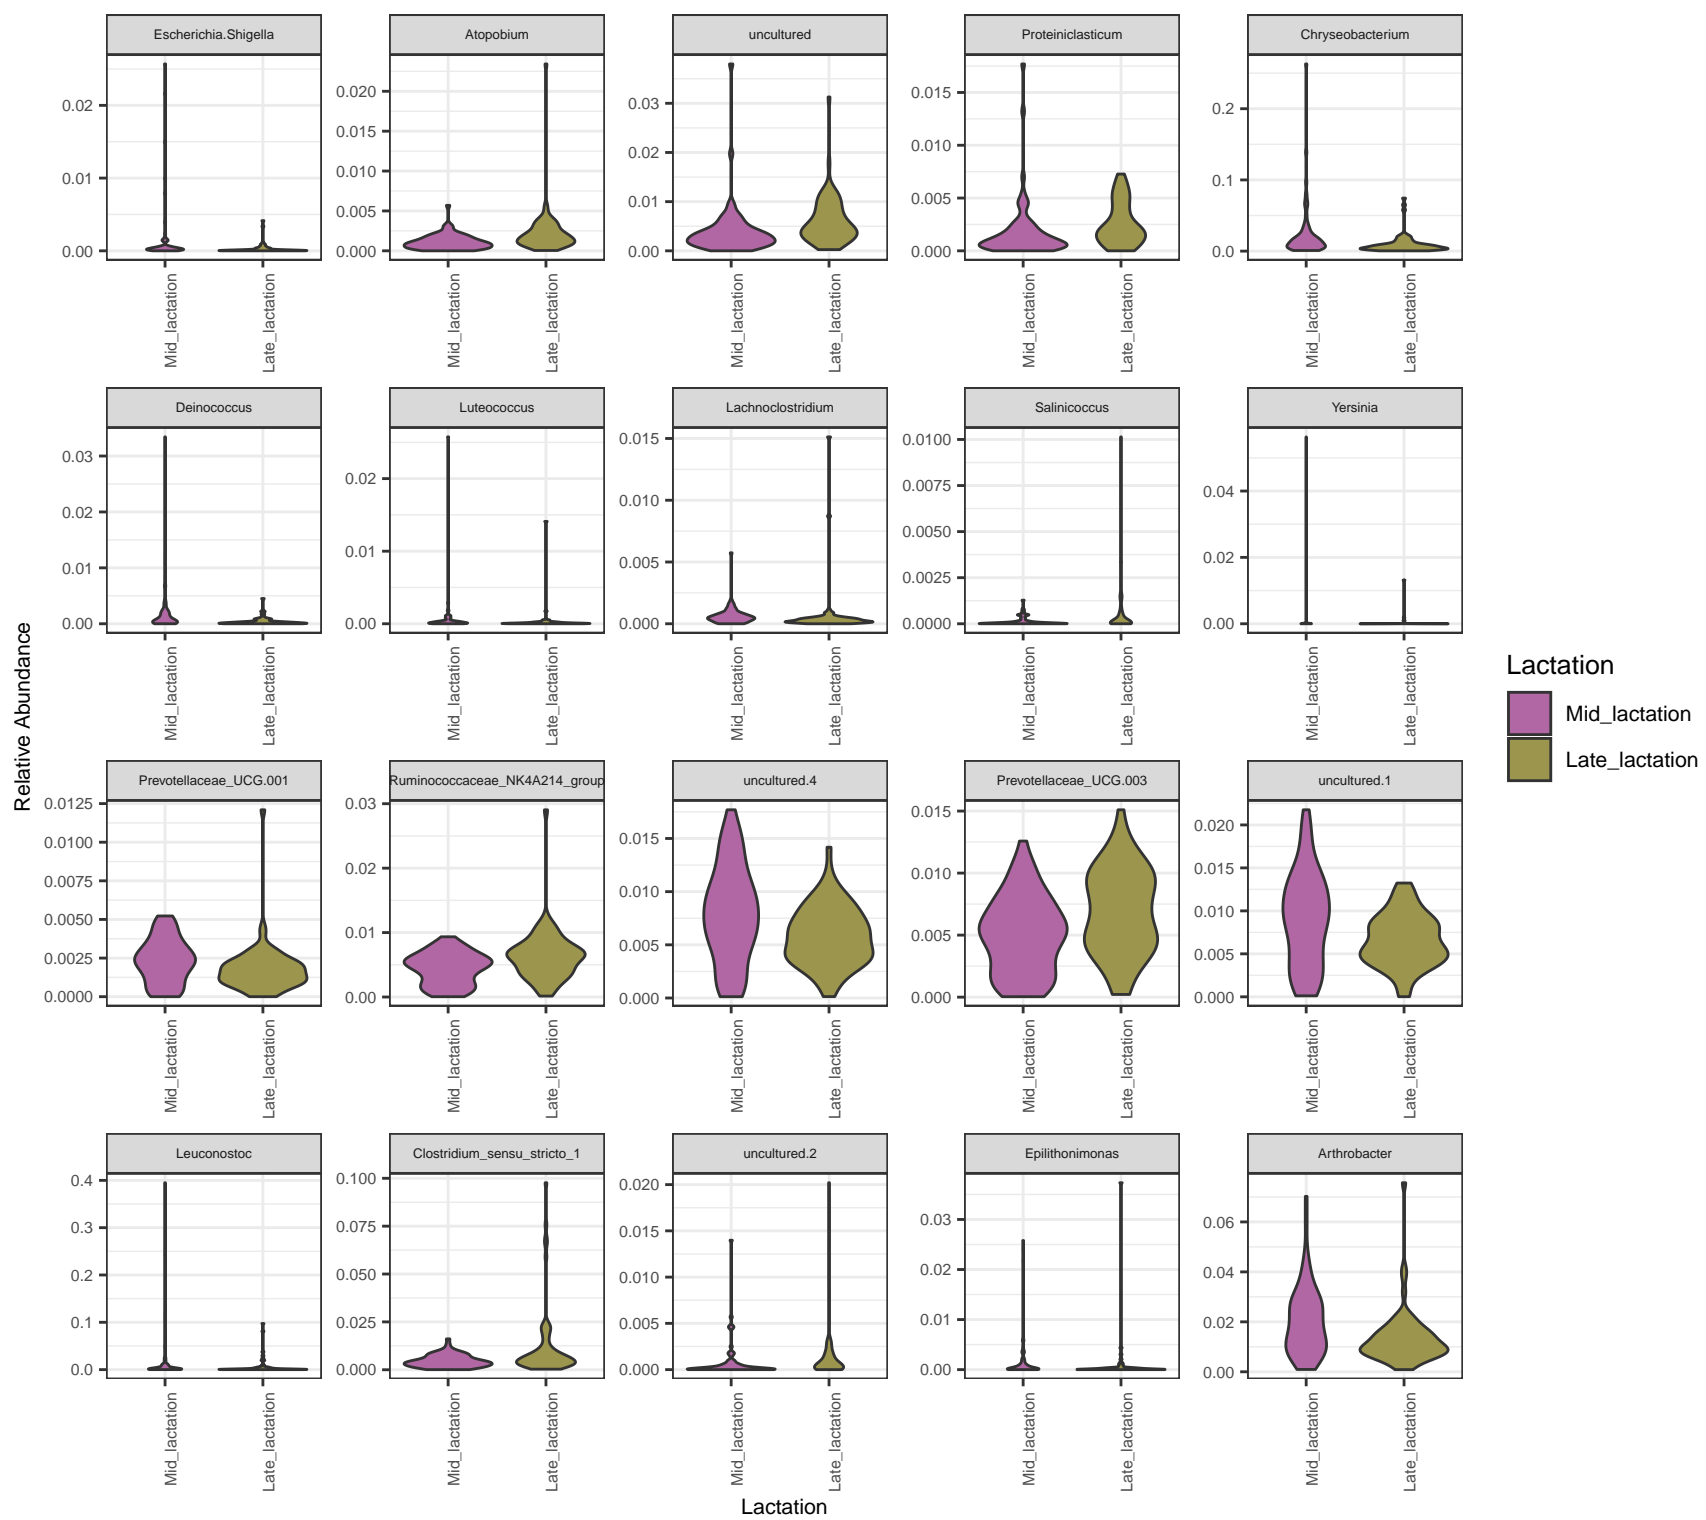

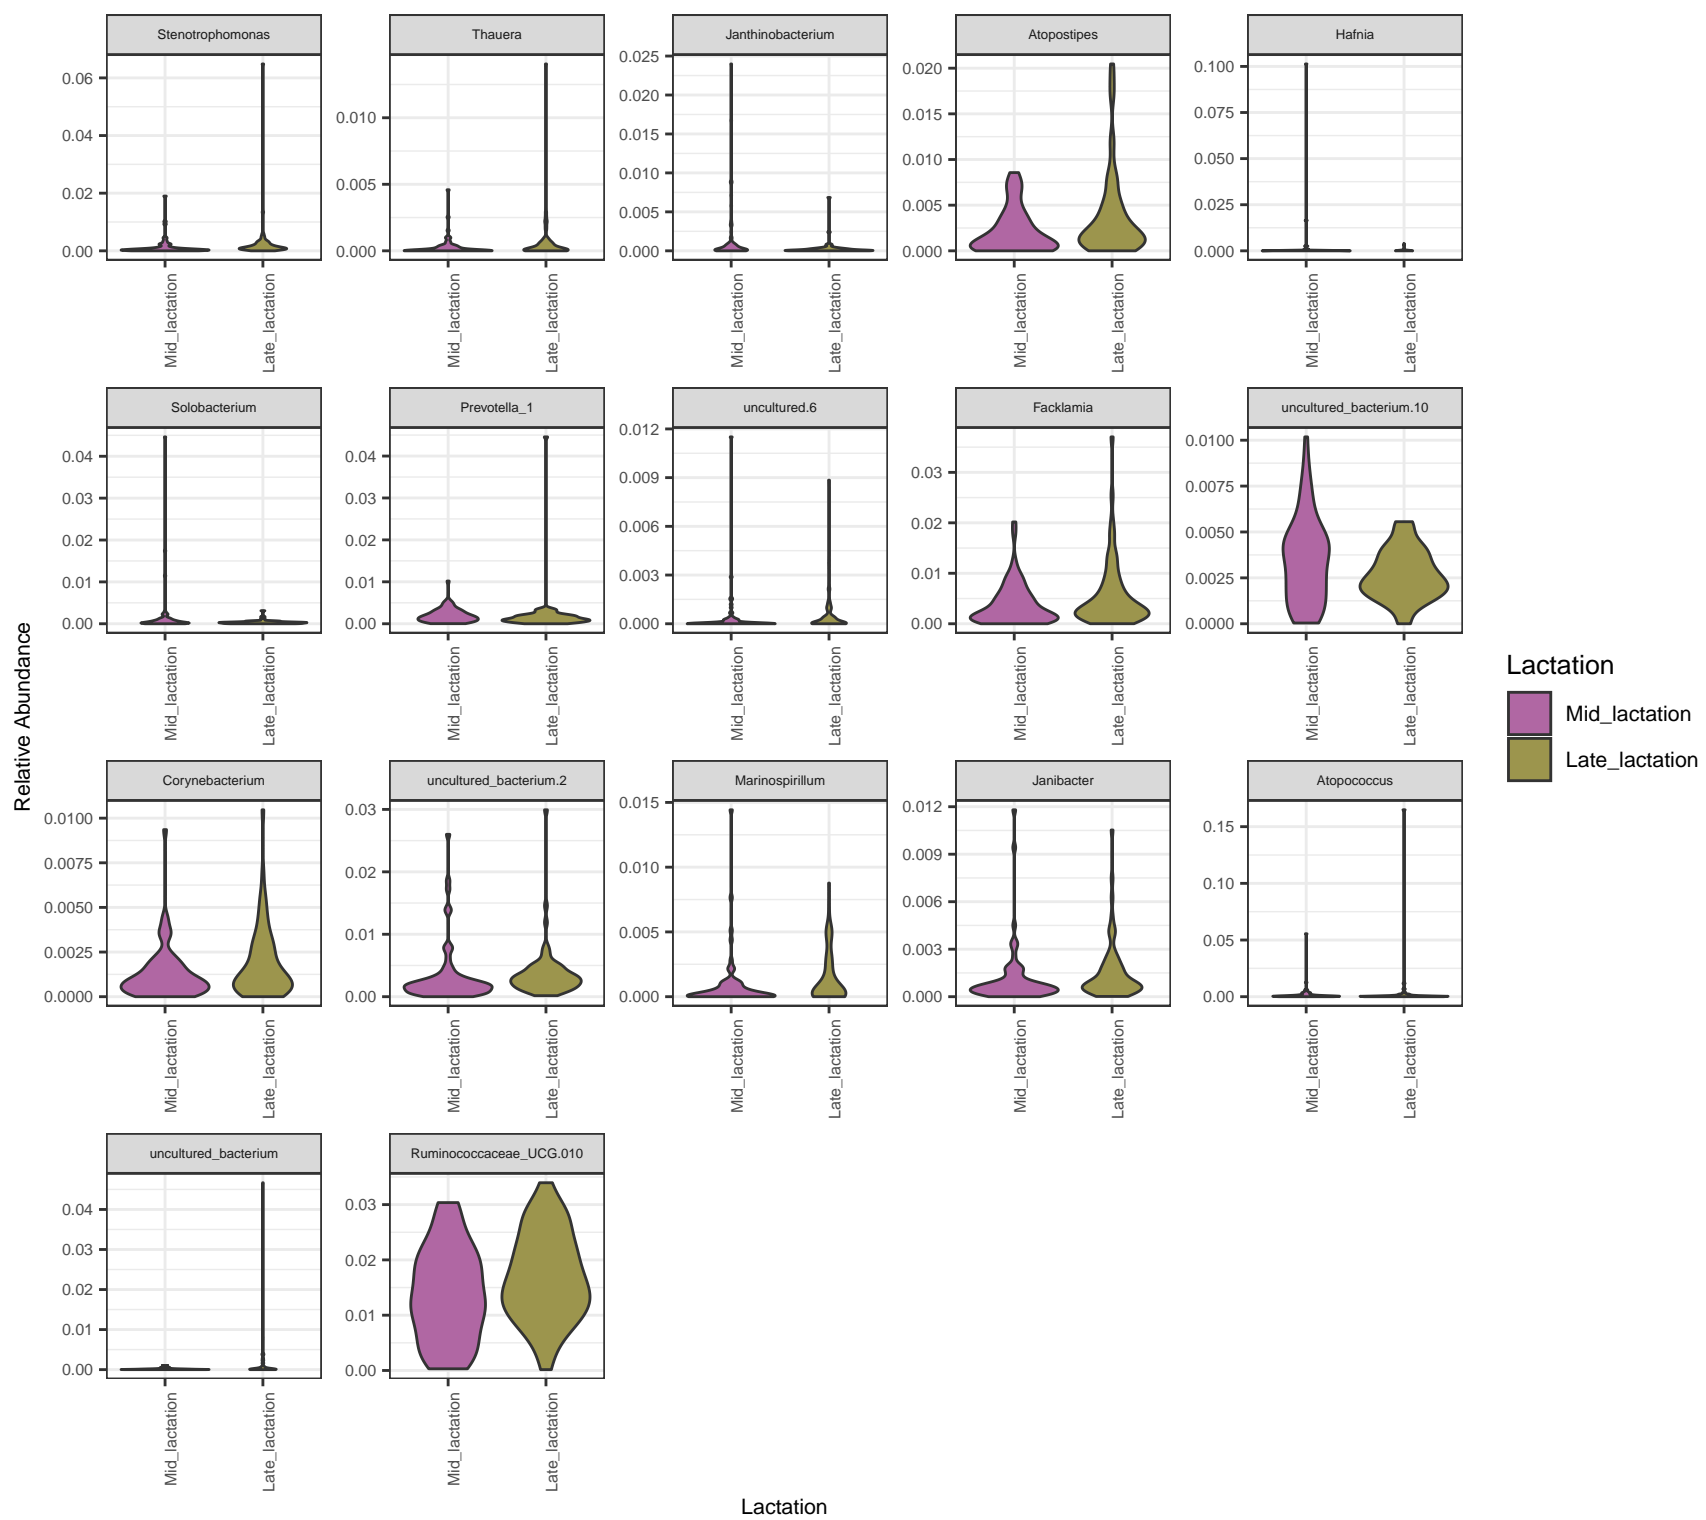

Supplement: mSystems.00226-20-sf002.pdf [file mSystems.00226-20-sf002.pdf]
